# Supplementary material for: A carbazole based “Turn on” fluorescent sensor for selective detection of Hg2+ in an aqueous medium
Source: Royal Society of Chemistry journal article supplement (doi:10.1039/c5ra27530j), 2016-01-01
Supplement: c5ra27530j1.pdf [file c5ra27530j1.pdf]

**Supporting Information for**  
**A Cabazole Based “Turn on” Fluorescent Sensor for Selective Detection of**  
**Hg<sup>2+</sup> in an Aqueous Medium**

K. Kala, N. Manoj\*

Department of Applied Chemistry, CUSAT, Kochi-682 022, Kerala, India, E-mail:  
[manoj.n@cusat.ac.in](mailto:manoj.n@cusat.ac.in)

**Contents:**

|                                                                                                                                                       |    |
|-------------------------------------------------------------------------------------------------------------------------------------------------------|----|
| 1. Experimental Section.....                                                                                                                          | 2  |
| 2. Figures                                                                                                                                            |    |
| <b>Figure S1:</b> <sup>1</sup> H- NMR of CBA.....                                                                                                     | 4  |
| <b>Figure S2:</b> <sup>13</sup> C- NMR of CBA.....                                                                                                    | 4  |
| <b>Figure S3:</b> ESI mass spectrum of CBA.....                                                                                                       | 5  |
| <b>Figure S4:</b> Absorption and emission spectrum of CBA.....                                                                                        | 5  |
| <b>Figure S5:</b> Job’s plot analysis of CBA with Hg <sup>2+</sup> .....                                                                              | 6  |
| <b>Figure S6:</b> <sup>1</sup> H NMR of CBA-Hg-CBA in THF-d8.....                                                                                     | 6  |
| <b>Figure S7:</b> MALDI- TOF mass spectrum of CBA –Hg complex .....                                                                                   | 7  |
| <b>Table S1:</b> Fragment ions observed in MALDI-TOF.....                                                                                             | 8  |
| <b>Figure S8:</b> Proposed geometry for the CBA-Hg-CBA complex .....                                                                                  | 9  |
| <b>Figure S9:</b> Fluorescence titration spectra of CBA to Hg <sup>2+</sup> .....                                                                     | 9  |
| <b>Figure S10:</b> Fluorescence intensity ratio (I-I <sub>0</sub> /I <sub>max</sub> -I <sub>0</sub> ) as the concentrations of Hg <sup>2+</sup> ..... | 10 |
| <b>Figure S11:</b> Emission spectrum of CBA, CBA-Hg complex and in presence of cysteamine hydrochloride .....                                         | 10 |
| <b>Figure S12:</b> Metal ion selectivity of CBA, absorption and emission spectra.....                                                                 | 11 |

## 1. Experimental Section

### 1.1. Reagents

Starting materials and reagents such as carbazole, 1-bromooctane, N-methylformanilide, and barbituric acid were purchased from Sigma-Aldrich and used as received. The solvents used in the synthesis procedures were obtained from Spectrochempvt.Ltd. and distilled before use. Spectroscopic grade solvents from Spectrochempvt. Ltd. were used for photophysical studies.

### 1.2. Experimental General

The  $^1\text{H}$  NMR and  $^{13}\text{C}$  NMR spectra were recorded on 400 MHz on Bruker FT-NMR spectrometer with tetramethylsilane (TMS) as internal standard. Chemical shifts were reported in parts per million (ppm) downfield to tetramethylsilane. High resolution mass spectra of new compounds were obtained using a WATERSSYNAPT2S spectrometer.

### 1.3. Synthesis of CBA

CBA was synthesized according to a reported procedure<sup>1</sup> by Knoevenagel condensation between 9-octyl-9H-carbazole-3-carbaldehyde and barbituric acid in ethanol yielded 85%.  $^1\text{H}$  NMR (dmsO  $d_6$ )  $\delta$  (ppm): 0.80 (t, 3H), 1.17–1.28 (m, 10H), 1.75–1.81 (m, 2H), 4.45 (t, 2H), 7.31 (t, 1H), 7.52 (t, 1H,  $J$   $\frac{1}{4}$  7.3 Hz), 7.65 (dd, 2H), 8.18 (d, 1H,  $J$   $\frac{1}{4}$  7.7 Hz), 8.53 (s, 1H), 8.60 (dd, 1H), 11.15 (s, 1H), 11.27 (s, 1H);  $^{13}\text{C}$  NMR (DMSO  $d_6$ )  $\delta$  (ppm): 13.84, 21.94, 26.34, 28.45, 28.51, 28.62, 31.08, 42.61, 109.24, 110.22, 114.06, 120.42, 120.47, 122.18, 122.38, 123.43, 126.69, 129.46, 133.27, 140.75, 143.12, 150.23, 156.86, 162.37, 164.18; HRMS (ESI MS)  $m/z$ : theoretical: 418.2125, found: 418.2115 ( $[\text{M} + \text{H}]^+$  detected).

### 1.4. General photophysical studies

A stock solution of CBA with the concentration of  $4.3 \times 10^{-3}\text{M}$  was prepared in tetrahydrofuran (THF) and stored in a cold and dark place. This stock solution was used for all spectrofluometric titrations after appropriate dilution. Absorption spectra were recorded using

Evolution 201 UV-visible spectrophotometer. Fluorescence emission spectrum of a sample was measured using a Perkin Elmer luminescence spectrophotometer (model LS 45).

#### 1.4.1. Determination of Fluorescence Quantum Yield

Quantum yield of fluorescence of CBA and CBA-Hg-CBA complex in 1:1 MeOH/H<sub>2</sub>O was determined by the method of relative actinometry reported elsewhere.<sup>2</sup> The reference used was N,N'-Bis(2-ethylhexyl)-3,4,9,10-perylenetetracarboxylic Diimide in chloroform ( $\Phi_f=0.99$ ).<sup>2</sup> The quantum yield of CBA and CBA-Hg-CBA was calculated as 0.002 and 0.195 respectively. Appropriate corrections for the refractive index and absorbance at the excitation wavelength (408 nm) were incorporated in the calculation.

#### 1.5. Determination of association constant

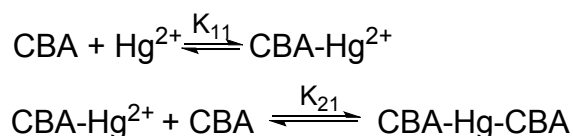

The association constant was calculated based on the fluorescence titration curve of CBA with metal ions. Association constant was determined by a nonlinear least squares fit of the data with the following equation (See Figure S8) as described elsewhere.<sup>3</sup>

$$y = \frac{x}{2ab(1-x)^2} + \frac{xb}{2}$$

Where  $x$  is  $(I - I_0) / (I_{\max} - I_0)$ ,  $y$  is the concentration of  $\text{Hg}^{2+}$  ions,  $a$  is the association constant  $K_{21}$ , and  $b$  is the concentration of CBA. Here  $I$  is the emission intensity at particular  $\text{Hg}^{2+}$  concentration,  $I_0$  is the initial emission intensity and  $I_{\max}$  is the final emission intensity from the fluorescence titration of CBA with  $\text{Hg}^{2+}$

#### 1.6. Job Plot by UV-Vis method<sup>4</sup>

A series of solutions containing CBA and  $\text{Hg}(\text{OAc})_2$  were prepared keeping sum of concentration of  $[\text{Hg}^{2+}]$  ion and  $[\text{CBA}]$  a constant, whereby, the mole fraction ( $X$ ) of  $\text{Hg}^{2+}$  was varied from 0.1 to 1.0. The Job's plot is obtained by plotting the absorbance ( $\text{abs}_{460} \times X_{\text{Hg}^{2+}}$ ) at 460 nm against the mole fraction of the  $\text{Hg}^{2+}$  (see Figure S5). The value of mole fraction

corresponding to the maximum on the Job's plot thus obtained was 0.4 indicative of a 2:1 binding stoichiometry.<sup>5</sup>

### 1.7. Detection limit calculations experimental procedure<sup>5</sup>

The detection limit was calculated based on the fluorescence titration. To calculate the S/N ratio, the emission intensity of CBA in the absence of Hg (II) was measured 10 times and the standard deviation ( $\sigma$ ) of blank measurements was determined. Three independent duplication measurements of emission intensity at 593 nm in the presence of Hg(II) and the average value of the intensities was plotted against concentration of Hg(II) for determining the slope ( $m$ ). The detection limit is then calculated with the following equation.

$$\text{Detection limit} = 3\sigma/m$$

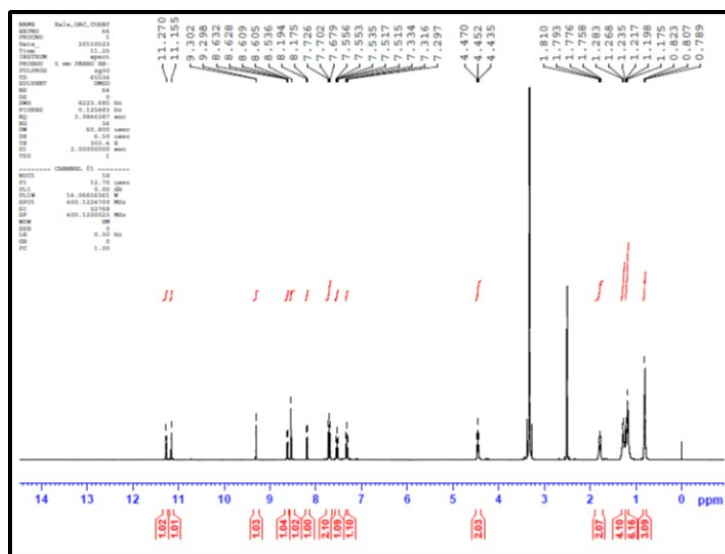

Figure S1. <sup>1</sup>H NMR of CBA

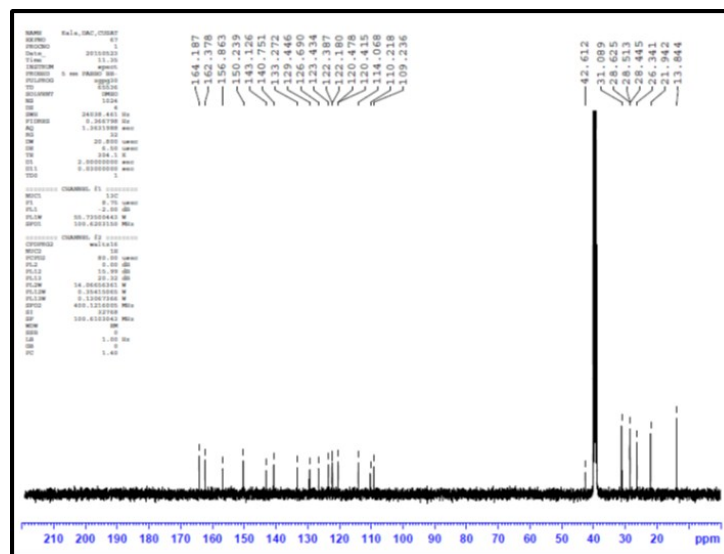

Figure S2. <sup>13</sup>C NMR of CBA

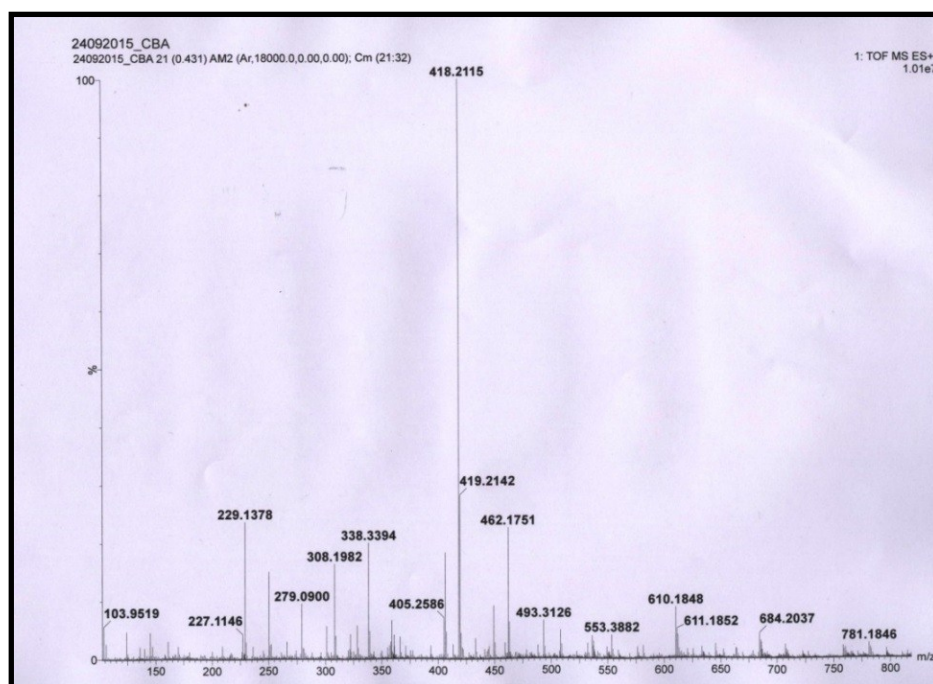

Figure S3. ESI mass spectrum of CBA

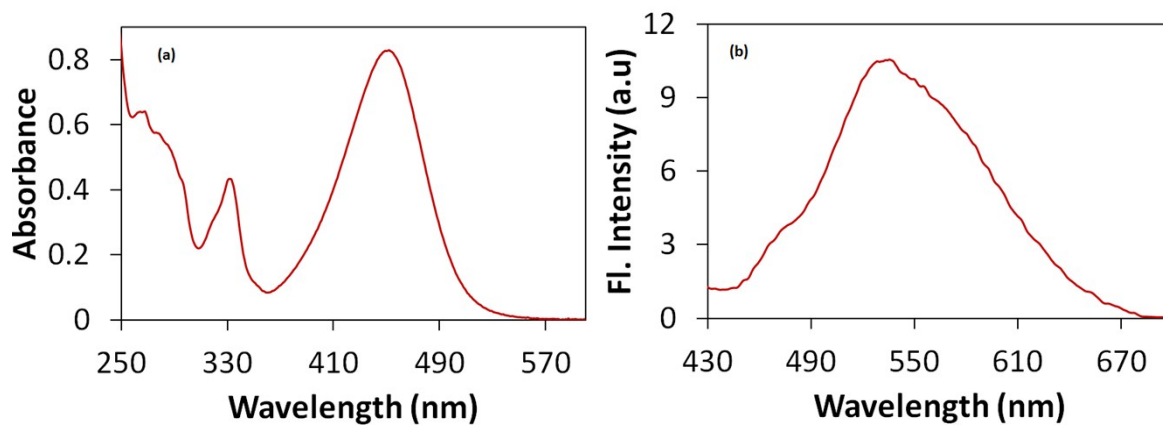

**Figure S4** Absorption (a) and emission spectrum (b) of CBA in 1:1 MeOH H<sub>2</sub>O.  $\lambda_{\text{ex}}$  408 nm

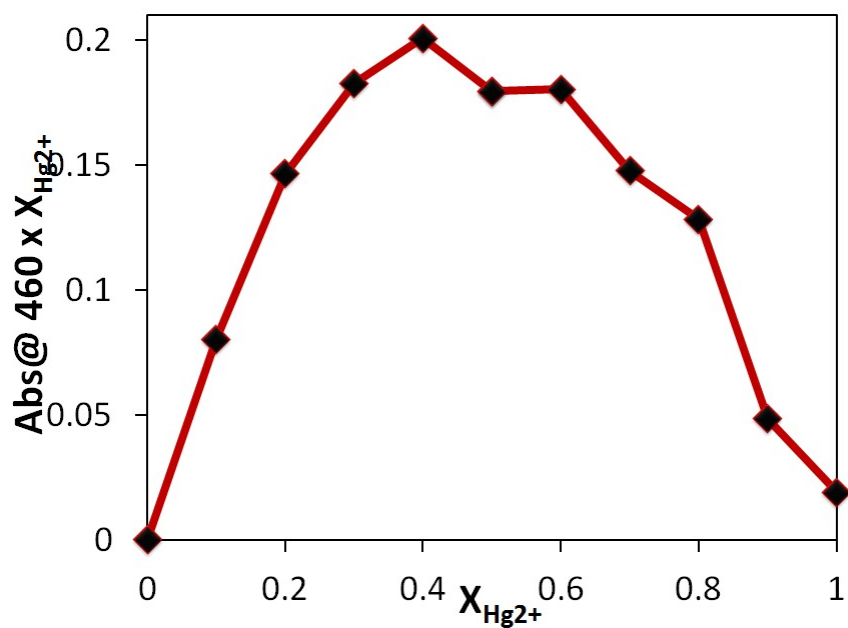

**Figure S5:** Job's plot analysis of CBA with Hg<sup>2+</sup> showing a 2:1 binding geometry.

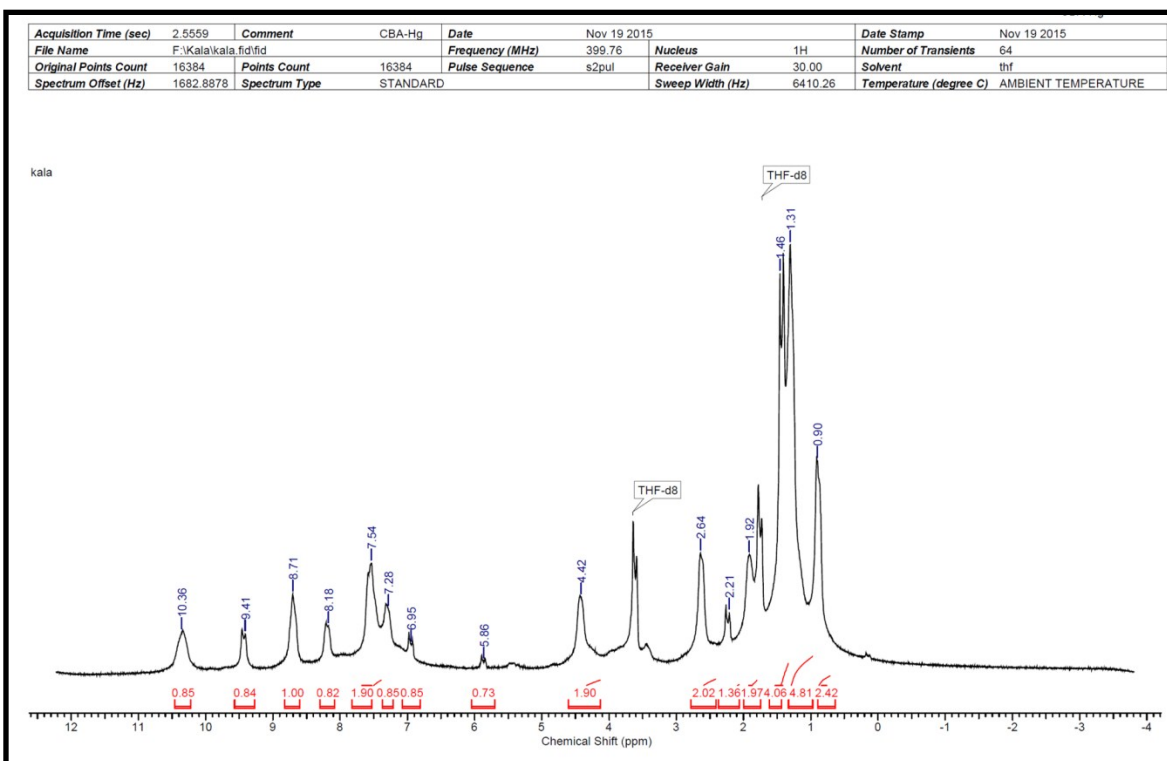

**Figure S6.**  $^1\text{H}$  NMR of CBA-Hg-CBA in THF-d8

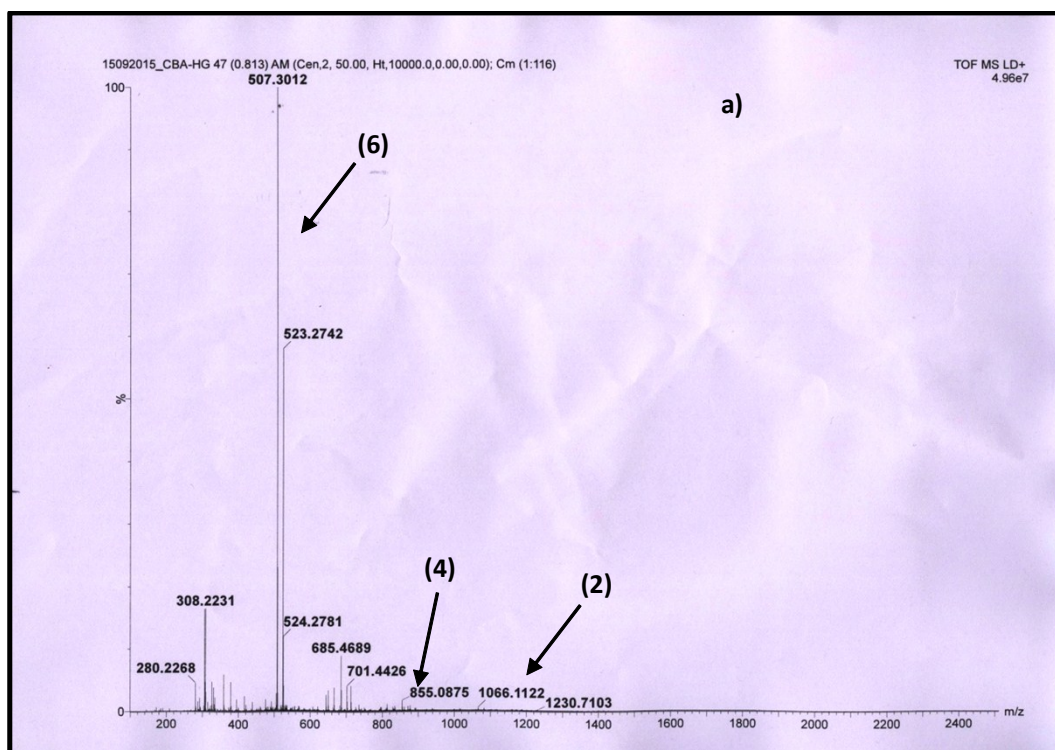

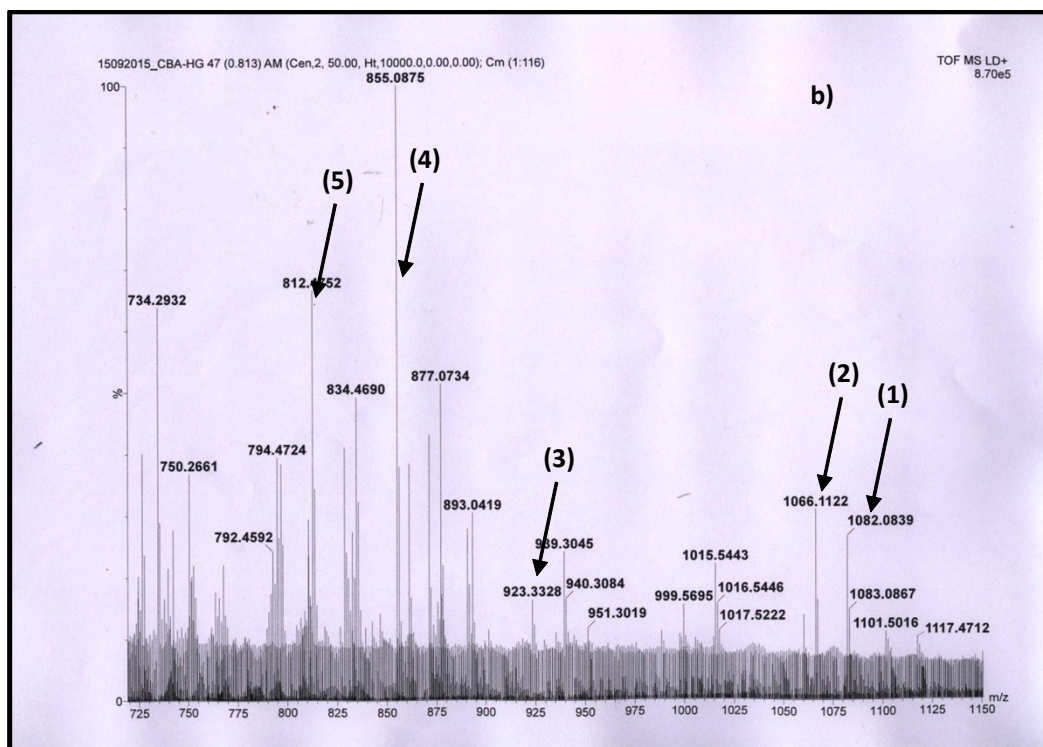

**Figure S7:** MALDI- TOF mass spectrum of CBA –Hg complex

**Table S1** Fragment ions observed in MALDI-TOF (Refer Figure S6 for Peak No.)<sup>6-7</sup>

| Peak No. | Fragment | Expected Mass | Observed Mass |
|----------|----------|---------------|---------------|
| 1        |          | 1082.3584     | 1082.0839     |
| 2        |          | 1066.3917     | 1066.1122     |



|   |  |          |          |
|---|--|----------|----------|
| 3 |  | 923.2475 | 923.3328 |
| 4 |  | 855.0862 | 855.0875 |
| 5 |  | 812.1296 | 812.4752 |
| 6 |  | 507.0496 | 507.3012 |

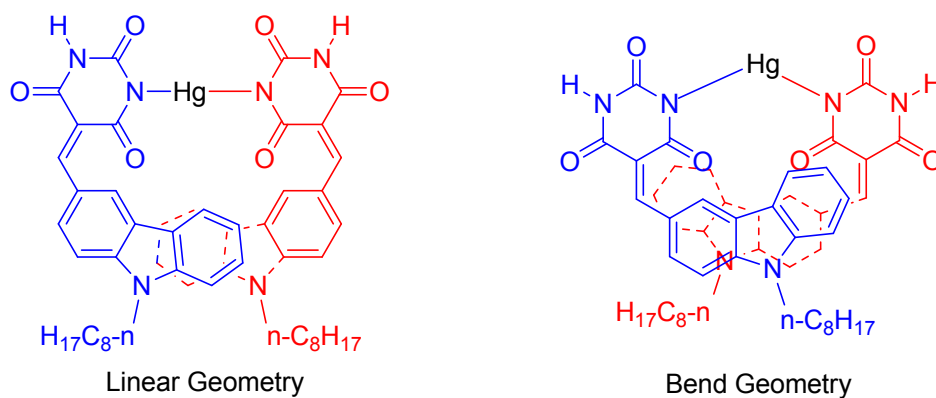

**Figure S8.** Proposed geometry for the CBA-Hg-CBA complex

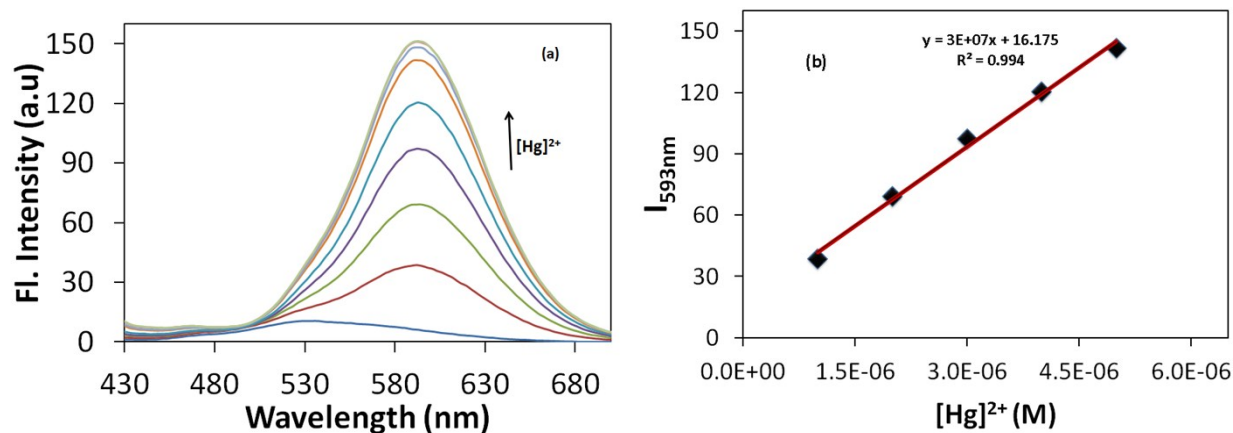

**Figure S9.** (a) Fluorescence spectra of CBA (10 $\mu$ M) in the presence of different concentration of Hg(OAc)<sub>2</sub> (1 $\times$ 10<sup>-6</sup>, 2 $\times$ 10<sup>-6</sup>, 3 $\times$ 10<sup>-6</sup>, 4 $\times$ 10<sup>-6</sup>, 5 $\times$ 10<sup>-6</sup>, 6 $\times$ 10<sup>-6</sup>, 7 $\times$ 10<sup>-6</sup>, 8 $\times$ 10<sup>-6</sup>) and (b) fluorescence intensity at 593nm as the concentrations of Hg(II) in MeOH/H<sub>2</sub>O (1:1, v/v).

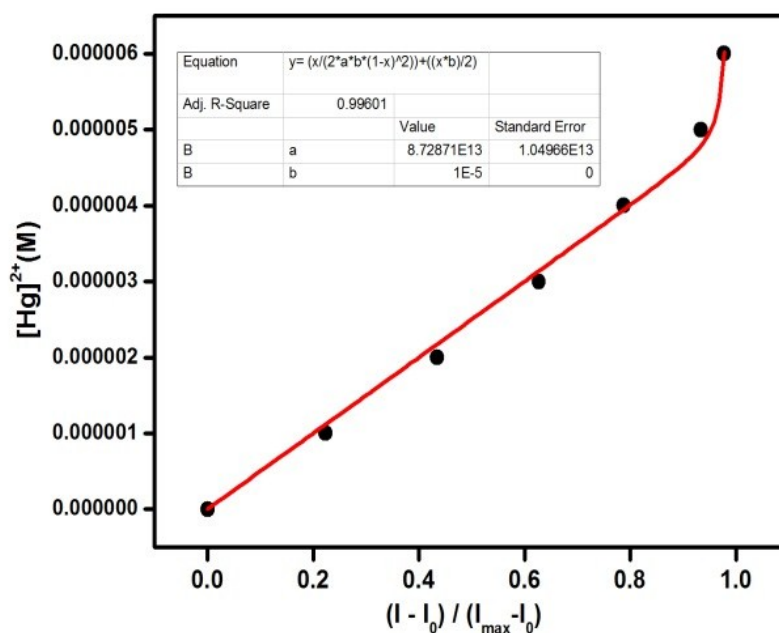

**Figure S10:** A plot of fluorescence intensity ratio  $(I - I_0) / (I_{max} - I_0)$  vs. concentrations of Hg<sup>2+</sup> in (1:1) MeOH/H<sub>2</sub>O.

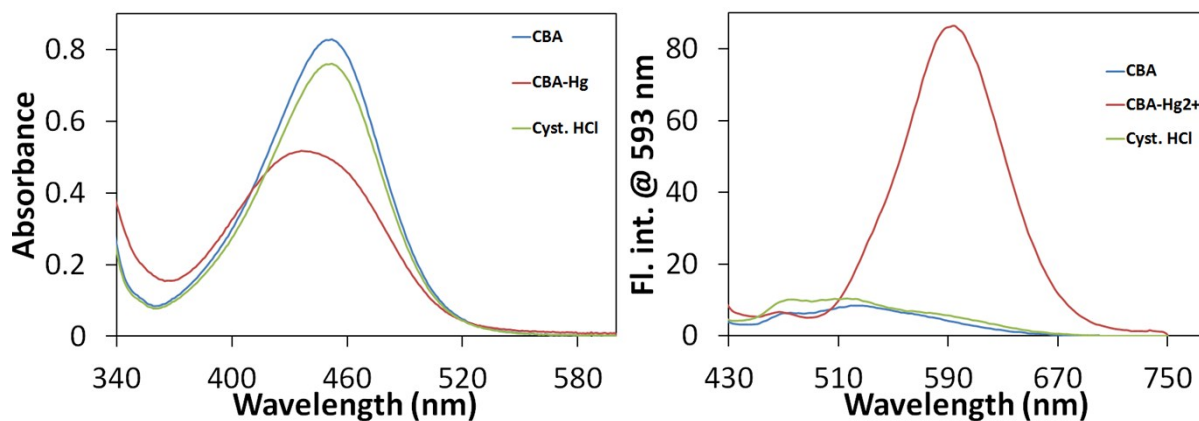

**Figure S11:** Absorption and emission spectrum of CBA, CBA-Hg-CBA complex and CBA-Hg-CBA complex in the presence of cysteamine hydrochloride.  $\lambda_{\text{ex}}$  408 nm

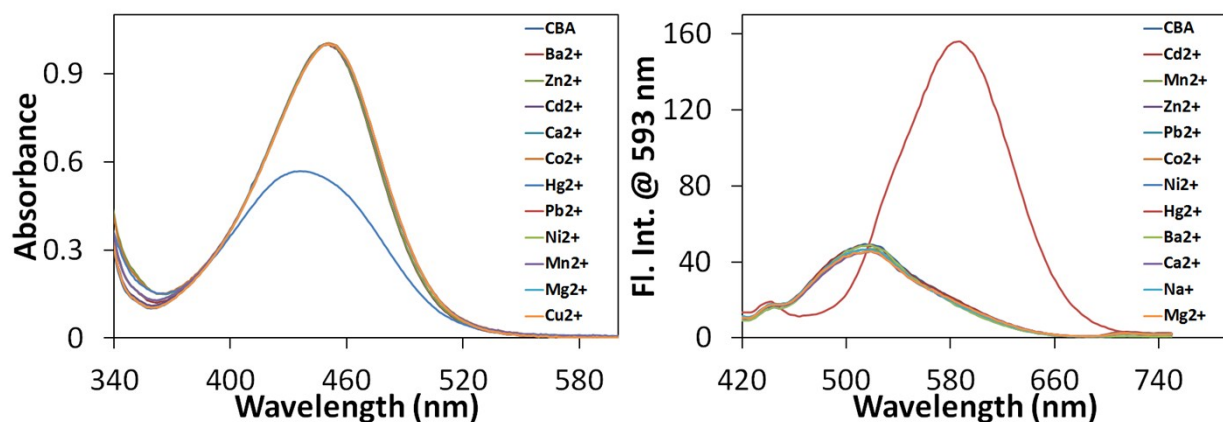

**Figure S12:** Absorption and emission spectra of CBA recorded in the presence of various metal ions (Metal ion concentration =  $35\mu\text{M}$ ,  $[\text{CBA}] = 26\mu\text{M}$ ) in MeOH/H<sub>2</sub>O (1:1).  $\lambda_{\text{ex}}$  408 nm

## References

1. M. A. Tehfe, F. Dumur, B. Graff, F. M. Savary, D. Gignes, J. P. Fouassier and J. Lalevee, *Polym. Chem.*, 2013, **4**, 3866.
2. U. Resch-Genger and K. Rurack, *Pure Appl. Chem.*, 2013, **85**, 2005.
3. Y. Kubo, M. Kato, Y. Misawa and S. Tokita, *Tetrahedron Lett.*, 2004, **45**, 3769.
4. D. Maity and T. Govindaraju, *Chem. Commun.*, 2010, **46**, 4499.
5. M. H. Yang, P. Thirupathi, K. H. Lee, *Org. Lett.*, 2011, **13**, 5028.

6. E. J. Reiner, R. A. Poirier, M. R. Peterson, I. G. Csizmadia and A. G. Harrison, *Can. J. Chem.*, 1986, **64**, 1652.
7. N. L. Bosma and A. G. Harrison *Can. J. Chem.*, 1994, **72**, 2205.
